# Supplementary material for: Effect of High-Carbohydrate Diet on Plasma Metabolome in Mice with Mitochondrial Respiratory Chain Complex III Deficiency
Source: MDPI journal article supplement (doi:10.3390/ijms17111824), 2016-11-01
Supplement: s1 [file s1]

# Supplementary Materials: Effect of High-Carbohydrate Diet on Plasma Metabolome in Mice with Mitochondrial Respiratory Chain Complex III Deficiency

Jayasimman Rajendran, Nikica Tomašić, Heike Kotarsky, Eva Hansson, Vidya Velagapudi, Jukka Kallijärvi and Vineta Fellman

**Table S1.** One-way ANOVA analysis for Plasma metabolomics.

| Metabolites                   | <i>f</i> Value | <i>p</i> Value         | Log <i>p</i> | FDR                   | Fisher's LSD                                                               |
|-------------------------------|----------------|------------------------|--------------|-----------------------|----------------------------------------------------------------------------|
| Ornithine                     | 49.494         | $6.94 \times 10^{-11}$ | 10.159       | $7.01 \times 10^{-9}$ | GG SD-GG HCD; GG SD-CO SD;<br>GG SD-CO HCD; GG HCD-CO SD;<br>GG HCD-CO HCD |
| Carnitine                     | 44.053         | $2.47 \times 10^{-10}$ | 9.6079       | $1.25 \times 10^{-8}$ | CO SD-GG SD; CO HCD-GG SD;<br>CO SD-GG HCD; CO HCD-GG HCD;<br>CO SD-CO HCD |
| Arginine                      | 32.735         | $5.57 \times 10^{-9}$  | 8.2545       | $1.87 \times 10^{-7}$ | CO SD-GG SD; CO HCD-GG SD;<br>CO SD-GG HCD; CO HCD-GG HCD                  |
| Glutamine                     | 27.743         | $2.91 \times 10^{-8}$  | 7.5363       | $7.34 \times 10^{-7}$ | GG SD-GG HCD; GG SD-CO SD;<br>GG SD-CO HCD; GG HCD-CO SD;<br>GG HCD-CO HCD |
| CholicAcid                    | 26.017         | $5.43 \times 10^{-8}$  | 7.2652       | $1.10 \times 10^{-6}$ | GG SD-GG HCD; GG SD-CO SD;<br>GG SD-CO HCD                                 |
| DimethylGlycine               | 23.703         | $1.32 \times 10^{-7}$  | 6.8802       | $2.22 \times 10^{-6}$ | GG SD-GG HCD; GG SD-CO SD;<br>GG SD-CO HCD; GG HCD-CO HCD                  |
| Glycine                       | 19.92          | $6.48 \times 10^{-7}$  | 6.1882       | $9.36 \times 10^{-6}$ | GG SD-GG HCD; GG SD-CO SD;<br>GG SD-CO HCD; GG HCD-CO SD;<br>GG HCD-CO HCD |
| Propionylcarnitine            | 19.462         | $7.97 \times 10^{-7}$  | 6.0985       | $9.96 \times 10^{-6}$ | CO SD-GG SD; CO SD-GG HCD;<br>CO SD-CO HCD                                 |
| Phenylalanine                 | 19.191         | $9.02 \times 10^{-7}$  | 6.0446       | $9.96 \times 10^{-6}$ | GG SD-GG HCD; GG SD-CO SD;<br>GG SD-CO HCD; GG HCD-CO SD                   |
| Sucrose                       | 18.998         | $9.86 \times 10^{-7}$  | 6.006        | $9.96 \times 10^{-6}$ | GG SD-GG HCD; GG SD-CO SD;<br>GG SD-CO HCD; GG HCD-CO SD;<br>GG HCD-CO HCD |
| Cytidine                      | 18.172         | $1.45 \times 10^{-6}$  | 5.8377       | $1.33 \times 10^{-5}$ | CO SD-GG SD; CO SD-GG HCD;<br>CO SD-CO HCD                                 |
| 5-Hydroxyindole-3-aceticacid  | 17.48          | $2.03 \times 10^{-6}$  | 5.6926       | $1.71 \times 10^{-5}$ | GG HCD-GG SD; GG HCD-CO SD;<br>GG HCD-CO HCD                               |
| Glyceraldehyde                | 17.241         | $2.28 \times 10^{-6}$  | 5.6416       | $1.77 \times 10^{-5}$ | GG SD-GG HCD; GG SD-CO SD;<br>GG SD-CO HCD; GG HCD-CO SD                   |
| NAD                           | 16.722         | $2.95 \times 10^{-6}$  | 5.5295       | $2.13 \times 10^{-5}$ | GG SD-CO SD; GG SD-CO HCD;<br>GG HCD-CO SD; GG HCD-CO HCD                  |
| Asparagine                    | 15.817         | $4.70 \times 10^{-6}$  | 5.3283       | $3.16 \times 10^{-5}$ | GG SD-GG HCD; GG SD-CO SD;<br>GG SD-CO HCD; GG HCD-CO SD;<br>GG HCD-CO HCD |
| SymmetriS<br>Dimethylarginine | 15.581         | $5.31 \times 10^{-6}$  | 5.2746       | $3.35 \times 10^{-5}$ | GG HCD-GG SD; GG SD-CO SD;<br>GG SD-CO HCD; GG HCD-CO SD;<br>GG HCD-CO HCD |
| 2-Aminoisobutyricacid         | 14.841         | $7.89 \times 10^{-6}$  | 5.1031       | $4.69 \times 10^{-5}$ | GG SD-CO SD; GG SD-CO HCD;<br>GG HCD-CO SD; GG HCD-CO HCD                  |
| Acetylcarnitine               | 14.725         | $8.40 \times 10^{-6}$  | 5.0756       | $4.71 \times 10^{-5}$ | CO SD-GG SD; CO SD-GG HCD;<br>CO SD-CO HCD                                 |
| KynurenicAcid                 | 14.029         | $1.23 \times 10^{-5}$  | 4.9087       | $6.56 \times 10^{-5}$ | GG HCD-GG SD; GG HCD-CO SD;<br>GG HCD-CO HCD                               |
| Serine                        | 13.916         | $1.31 \times 10^{-5}$  | 4.8811       | $6.64 \times 10^{-5}$ | GG SD-CO SD; GG SD-CO HCD;<br>GG HCD-CO SD; GG HCD-CO HCD                  |

Table S1. Cont.

| Metabolites                 | <i>f</i> Value | <i>p</i> Value          | Log <i>p</i> | FDR                     | Fisher's LSD                                               |
|-----------------------------|----------------|-------------------------|--------------|-------------------------|------------------------------------------------------------|
| Creatinine                  | 13.723         | $1.47 \times 10^{-5}$   | 4.8337       | $7.05 \times 10^{-5}$   | GG HCD-GG SD; GG HCD-CO SD;<br>GG HCD-CO HCD               |
| L-5-Hydroxytryptophan       | 12.998         | $2.23 \times 10^{-5}$   | 4.6519       | $9.98 \times 10^{-5}$   | GG SD-GG HCD; GG SD-CO SD;<br>GG SD-CO HCD; GG HCD-CO SD   |
| Leucine                     | 12.965         | $2.27 \times 10^{-5}$   | 4.6437       | $9.98 \times 10^{-5}$   | GG SD-GG HCD; GG SD-CO SD;<br>GG SD-CO HCD; GG HCD-CO SD   |
| Tyrosine                    | 11.99          | $4.08 \times 10^{-5}$   | 4.3895       | $1.72 \times 10^{-4}$   | GG SD-GG HCD; GG SD-CO SD;<br>GG SD-CO HCD; GG HCD-CO SD   |
| 2-deoxyuridine              | 11.725         | $4.81 \times 10^{-5}$   | 4.3182       | $1.94 \times 10^{-4}$   | CO HCD-GG SD; CO HCD-GG<br>HCD; CO HCD-CO SD               |
| Alanine                     | 10.299         | $1.2 \times 10^{-4}$    | 3.9199       | $4.67 \times 10^{-4}$   | GG SD-CO SD; GG SD-CO HCD;<br>GG HCD-CO SD; GG HCD-CO HCD  |
| Histidine                   | 10.105         | $1.37 \times 10^{-4}$   | 3.8636       | $5.12 \times 10^{-4}$   | GG SD-CO SD; GG SD-CO HCD;<br>GG HCD-CO SD; GG HCD-CO HCD  |
| 4-PyridoxicAcid             | 8.9863         | $2.97 \times 10^{-4}$   | 3.5273       | $1.071 \times 10^{-3}$  | GG HCD-GG SD; GG HCD-CO SD;<br>GG HCD-CO HCD               |
| Citrulline                  | 8.7693         | $3.47 \times 10^{-4}$   | 3.4597       | $1.208 \times 10^{-3}$  | GG SD-CO SD; GG SD-CO HCD;<br>GG HCD-CO SD; GG HCD-CO HCD  |
| Lysine                      | 8.6957         | $3.66 \times 10^{-4}$   | 3.4366       | $1.23 \times 10^{-3}$   | GG SD-CO SD; GG HCD-CO SD;<br>CO HCD-CO SD                 |
| Isobutyrylcarnitine         | 8.6157         | $3.88 \times 10^{-4}$   | 3.4114       | $1.23 \times 10^{-3}$   | GG SD-GG HCD; GG SD-CO SD;<br>GG SD-CO HCD; CO SD-CO HCD   |
| L-Methionine                | 8.6088         | $3.9 \times 10^{-4}$    | 3.4092       | $1.23 \times 10^{-3}$   | GG SD-CO SD; GG HCD-CO SD;<br>CO HCD-CO SD                 |
| Proline                     | 7.8377         | $6.91 \times 10^{-4}$   | 3.1605       | $2.115 \times 10^{-3}$  | GG SD-CO SD; GG HCD-CO SD;<br>GG HCD-CO HCD                |
| AminodipicAcid              | 7.7256         | $7.53 \times 10^{-4}$   | 3.1234       | $2.236 \times 10^{-3}$  | GG SD-CO SD; GG HCD-CO SD;<br>CO HCD-CO SD                 |
| Normetanephrene             | 7.6403         | $8.03 \times 10^{-4}$   | 3.0951       | $2.318 \times 10^{-3}$  | GG HCD-GG SD; CO SD-GG SD;<br>CO HCD-GG SD                 |
| Valine                      | 7.0742         | $1.249 \times 10^{-3}$  | 2.9034       | $3.504 \times 10^{-3}$  | GG SD-CO SD; GG HCD-CO SD;<br>CO HCD-CO SD                 |
| Cystathionine               | 6.8357         | $1.511 \times 10^{-3}$  | 2.8208       | $4.124 \times 10^{-3}$  | GG SD-CO SD; GG SD-CO HCD;<br>GG HCD-CO SD                 |
| L-Kynurenine                | 6.1515         | $2.648 \times 10^{-3}$  | 2.5771       | $7.038 \times 10^{-3}$  | GG SD-CO SD; GG SD-CO HCD;<br>GG HCD-CO SD                 |
| Asymmetric-Dimethylarginine | 6.1017         | $2.761 \times 10^{-3}$  | 2.5589       | $7.15 \times 10^{-3}$   | GG SD-GG HCD; GG SD-CO SD;<br>GG SD-CO HCD                 |
| Allantoin                   | 5.7268         | $3.796 \times 10^{-3}$  | 2.4207       | $9.585 \times 10^{-3}$  | GG SD-CO HCD; GG HCD-CO SD;<br>GG HCD-CO HCD; CO SD-CO HCD |
| PantothenicAcid             | 5.5058         | $4.595 \times 10^{-3}$  | 2.3377       | $1.132 \times 10^{-2}$  | GG HCD-GG SD; CO HCD-GG SD;<br>GG HCD-CO SD                |
| cAMP                        | 5.4261         | $4.926 \times 10^{-3}$  | 2.3075       | $1.1846 \times 10^{-2}$ | GG HCD-GG SD; GG HCD-CO SD;<br>GG HCD-CO HCD               |
| Isoleucine                  | 5.3479         | $5.276 \times 10^{-3}$  | 2.2777       | $1.2393 \times 10^{-2}$ | GG SD-CO SD; GG HCD-CO SD                                  |
| L-GlutamicAcid              | 5.1635         | $6.21 \times 10^{-3}$   | 2.2069       | $1.4256 \times 10^{-2}$ | CO SD-GG SD; CO HCD-GG SD;<br>CO HCD-GG HCD                |
| GABA                        | 4.9664         | $7.408 \times 10^{-3}$  | 2.1303       | $1.6626 \times 10^{-2}$ | GG SD-CO SD; GG HCD-CO SD;<br>GG HCD-CO HCD                |
| 3-Hydroxy-DL-kynurenine     | 4.9305         | $7.651 \times 10^{-3}$  | 2.1163       | $1.68 \times 10^{-2}$   | GG SD-CO SD; GG SD-CO HCD;<br>GG HCD-CO SD                 |
| Adenosine                   | 4.8552         | $8.19 \times 10^{-3}$   | 2.0867       | $1.7601 \times 10^{-2}$ | GG HCD-CO SD; GG HCD-CO HCD                                |
| Succinate                   | 4.2698         | $1.4064 \times 10^{-2}$ | 1.8519       | $2.9593 \times 10^{-2}$ | CO SD-GG SD; CO HCD-GG SD;<br>CO SD-GG HCD; CO HCD-GG HCD  |
| deoxycytidine               | 3.8474         | $2.1037 \times 10^{-2}$ | 1.677        | $4.2039 \times 10^{-2}$ | CO SD-GG SD; CO SD-CO HCD                                  |
| TaurochenodeoxycholicAcid   | 3.8413         | $2.1162 \times 10^{-2}$ | 1.6744       | $4.2039 \times 10^{-2}$ | GG SD-CO SD; GG SD-CO HCD                                  |
| GlycocholicAcid             | 3.8381         | $2.1227 \times 10^{-2}$ | 1.6731       | $4.2039 \times 10^{-2}$ | GG SD-GG HCD; GG SD-CO HCD;<br>CO SD-CO HCD                |

**Table S1.** *Cont.*

| Metabolites                     | <i>f</i> Value | <i>p</i> Value          | Log <i>p</i> | FDR                     | Fisher's LSD                                              |
|---------------------------------|----------------|-------------------------|--------------|-------------------------|-----------------------------------------------------------|
| Myoinositol                     | 3.7122         | $2.3984 \times 10^{-2}$ | 1.6201       | $4.6585 \times 10^{-2}$ | GG SD-CO HCD; CO SD-CO HCD                                |
| Cotinine                        | 3.6899         | $2.4512 \times 10^{-2}$ | 1.6106       | $4.6711 \times 10^{-2}$ | GG HCD-GG SD; CO SD-GG SD;<br>CO HCD-GG SD                |
| TaurocholicAcid                 | 3.6485         | $2.5525 \times 10^{-2}$ | 1.593        | $4.7741 \times 10^{-2}$ | GG SD-CO SD; GG SD-CO HCD;<br>GG HCD-CO SD                |
| Niacinamide                     | 3.6226         | $2.6179 \times 10^{-2}$ | 1.582        | $4.8074 \times 10^{-2}$ | CO HCD-GG SD; CO HCD-CO SD                                |
| ChenodeoxycholicAcid            | 3.5855         | 0.02715                 | 1.5662       | $4.8967 \times 10^{-2}$ | GG SD-GG HCD; GG SD-CO SD                                 |
| Trimethylamine- <i>N</i> -Oxide | 3.3463         | $3.4397 \times 10^{-2}$ | 1.4635       | $6.095 \times 10^{-2}$  | CO SD-GG SD; CO SD-GG HCD                                 |
| Uracil                          | 3.2606         | $3.7474 \times 10^{-2}$ | 1.4263       | $6.5257 \times 10^{-2}$ | CO SD-GG SD; CO HCD-GG SD                                 |
| Xanthine                        | 3.2286         | $3.8696 \times 10^{-2}$ | 1.4123       | $6.6241 \times 10^{-2}$ | CO SD-GG SD; CO HCD-GG SD;<br>CO SD-GG HCD; CO HCD-GG HCD |
| Adenine                         | 3.1326         | $4.2622 \times 10^{-2}$ | 1.3704       | $7.1747 \times 10^{-2}$ | GG HCD-GG SD; GG HCD-CO SD;<br>GG HCD-CO HCD              |
| NicotinicAcid                   | 3.1126         | $4.3492 \times 10^{-2}$ | 1.3616       | $7.2012 \times 10^{-2}$ | GG SD-GG HCD; GG SD-CO SD;<br>GG SD-CO HCD                |
| Hexanoylcarnitine               | 3.0808         | $4.4914 \times 10^{-2}$ | 1.3476       | $7.3167 \times 10^{-2}$ | CO SD-GG HCD; CO SD-CO HCD                                |

FDR—False discovery rate; LSD—Least significant difference; GG—homozygous mice; CO—control mice; SD—standard diet; HCD—High carbohydrate diet; NAD—Nicotinamide adenine dinucleotide; GABA— $\gamma$ -Aminobutyric acid.

**Table S2.** Result of quantitative enrichment analysis between Control and homozygous mice on standard diet.

| Metabolic Pathways                            | Total Cmpd | Hits | Statistic <i>q</i> | Expected <i>q</i> | Raw <i>p</i>           | Holm <i>p</i>           | FDR                    |
|-----------------------------------------------|------------|------|--------------------|-------------------|------------------------|-------------------------|------------------------|
| Glycolysis                                    | 21         | 1    | 89.092             | 5.8824            | $4.14 \times 10^{-9}$  | $2.57 \times 10^{-7}$   | $8.56 \times 10^{-8}$  |
| Glycerol phosphate shuttle                    | 8          | 1    | 89.092             | 5.8824            | $4.14 \times 10^{-9}$  | $2.57 \times 10^{-7}$   | $8.56 \times 10^{-8}$  |
| Gluconeogenesis                               | 27         | 1    | 89.092             | 5.8824            | $4.14 \times 10^{-9}$  | $2.57 \times 10^{-7}$   | $8.56 \times 10^{-8}$  |
| Arginine and proline metabolism               | 26         | 8    | 46.435             | 5.8824            | $5.81 \times 10^{-9}$  | $3.43 \times 10^{-7}$   | $9.00 \times 10^{-8}$  |
| Urea cycle                                    | 20         | 7    | 49.351             | 5.8824            | $1.07 \times 10^{-8}$  | $6.21 \times 10^{-7}$   | $1.33 \times 10^{-7}$  |
| Ketone body metabolism                        | 10         | 2    | 45.295             | 5.8824            | $2.40 \times 10^{-8}$  | $1.37 \times 10^{-6}$   | $2.48 \times 10^{-7}$  |
| Glutamate metabolism                          | 18         | 7    | 44.937             | 5.8824            | $9.29 \times 10^{-8}$  | $5.20 \times 10^{-6}$   | $8.23 \times 10^{-7}$  |
| Ammonia recycling                             | 18         | 8    | 61.363             | 5.8824            | $1.07 \times 10^{-7}$  | $5.87 \times 10^{-6}$   | $8.27 \times 10^{-7}$  |
| Glycine, serine and threonine metabolism      | 26         | 9    | 38.756             | 5.8824            | $1.75 \times 10^{-7}$  | $9.44 \times 10^{-6}$   | $1.20 \times 10^{-6}$  |
| Methionine metabolism                         | 24         | 9    | 38.177             | 5.8824            | $4.25 \times 10^{-7}$  | $2.25 \times 10^{-5}$   | $2.64 \times 10^{-6}$  |
| Glucose-alanine cycle                         | 12         | 2    | 68.551             | 5.8824            | $5.42 \times 10^{-7}$  | $2.82 \times 10^{-5}$   | $3.06 \times 10^{-6}$  |
| Protein biosynthesis                          | 19         | 14   | 58.955             | 5.8824            | $8.10 \times 10^{-7}$  | $4.13 \times 10^{-5}$   | $4.05 \times 10^{-6}$  |
| Malate-aspartate shuttle                      | 8          | 3    | 46.562             | 5.8824            | $8.50 \times 10^{-7}$  | $4.25 \times 10^{-5}$   | $4.05 \times 10^{-6}$  |
| Citric acid cycle                             | 23         | 2    | 59.415             | 5.8824            | $1.51 \times 10^{-6}$  | $7.41 \times 10^{-5}$   | $6.25 \times 10^{-6}$  |
| Mitochondrial electron transport chain        | 15         | 2    | 59.415             | 5.8824            | $1.51 \times 10^{-6}$  | $7.41 \times 10^{-5}$   | $6.25 \times 10^{-6}$  |
| Nicotinate and nicotinamide metabolism        | 13         | 3    | 42.225             | 5.8824            | $2.65 \times 10^{-6}$  | $1.25 \times 10^{-4}$   | $1.03 \times 10^{-5}$  |
| Glutathione metabolism                        | 10         | 4    | 37.882             | 5.8824            | $2.83 \times 10^{-6}$  | $1.3 \times 10^{-4}$    | $1.03 \times 10^{-5}$  |
| Glycerolipid metabolism                       | 13         | 1    | 74.897             | 5.8824            | $3.51 \times 10^{-6}$  | $1.58 \times 10^{-4}$   | $1.15 \times 10^{-5}$  |
| Pyrimidine metabolism                         | 36         | 6    | 36.69              | 5.8824            | $3.54 \times 10^{-6}$  | $1.58 \times 10^{-4}$   | $1.15 \times 10^{-5}$  |
| Porphyryn metabolism                          | 22         | 1    | 74                 | 5.8824            | $4.68 \times 10^{-6}$  | $2.01 \times 10^{-4}$   | $1.45 \times 10^{-5}$  |
| Lysine degradation                            | 13         | 2    | 69.046             | 5.8824            | $5.19 \times 10^{-6}$  | $2.18 \times 10^{-4}$   | $1.53 \times 10^{-5}$  |
| Tyrosine metabolism                           | 38         | 4    | 33.987             | 5.8824            | $6.41 \times 10^{-6}$  | $2.63 \times 10^{-4}$   | $1.81 \times 10^{-5}$  |
| Bile acid biosynthesis                        | 49         | 7    | 41.706             | 5.8824            | $7.81 \times 10^{-6}$  | $3.12 \times 10^{-4}$   | $2.10 \times 10^{-5}$  |
| Oxidation of branched chain fatty acids       | 14         | 2    | 65.742             | 5.8824            | $1.07 \times 10^{-5}$  | $4.18 \times 10^{-4}$   | $2.77 \times 10^{-5}$  |
| Phenylalanine and tyrosine metabolism         | 13         | 4    | 37.466             | 5.8824            | $1.13 \times 10^{-5}$  | $4.3 \times 10^{-4}$    | $2.80 \times 10^{-5}$  |
| Valine, leucine and isoleucine degradation    | 36         | 3    | 46.168             | 5.8824            | $1.41 \times 10^{-5}$  | $5.2 \times 10^{-4}$    | $3.35 \times 10^{-5}$  |
| Tryptophan metabolism                         | 34         | 5    | 39.984             | 5.8824            | $2.88 \times 10^{-5}$  | $1.037 \times 10^{-3}$  | $6.62 \times 10^{-5}$  |
| Biotin metabolism                             | 4          | 1    | 67.34              | 5.8824            | $3.02 \times 10^{-5}$  | $1.057 \times 10^{-3}$  | $6.69 \times 10^{-5}$  |
| Catecholamine biosynthesis                    | 5          | 1    | 65.975             | 5.8824            | $4.23 \times 10^{-5}$  | $1.437 \times 10^{-3}$  | $9.04 \times 10^{-5}$  |
| Betaine metabolism                            | 10         | 5    | 29.452             | 5.8824            | $4.63 \times 10^{-5}$  | $1.527 \times 10^{-3}$  | $9.57 \times 10^{-5}$  |
| Sphingolipid metabolism                       | 15         | 2    | 35.992             | 5.8824            | $7.38 \times 10^{-5}$  | $2.361 \times 10^{-3}$  | $1.48 \times 10^{-4}$  |
| Propanoate metabolism                         | 18         | 1    | 63.429             | 5.8824            | $7.66 \times 10^{-5}$  | $2.373 \times 10^{-3}$  | $1.48 \times 10^{-4}$  |
| Beta oxidation of very long chain fatty acids | 14         | 1    | 61.872             | 5.8824            | $1.08 \times 10^{-4}$  | $3.24 \times 10^{-3}$   | $2.03 \times 10^{-4}$  |
| Histidine metabolism                          | 11         | 4    | 32.538             | 5.8824            | $3.86 \times 10^{-4}$  | $1.1186 \times 10^{-2}$ | $7.03 \times 10^{-4}$  |
| Aspartate metabolism                          | 12         | 3    | 40.198             | 5.8824            | $4.05 \times 10^{-4}$  | $1.1344 \times 10^{-2}$ | $7.18 \times 10^{-4}$  |
| Purine metabolism                             | 45         | 12   | 20.47              | 5.8824            | $9.15 \times 10^{-4}$  | $2.4705 \times 10^{-2}$ | $1.576 \times 10^{-3}$ |
| Alanine metabolism                            | 6          | 1    | 48.009             | 5.8824            | $1.434 \times 10^{-3}$ | $3.7285 \times 10^{-2}$ | $2.403 \times 10^{-3}$ |
| Starch and sucrose metabolism                 | 14         | 3    | 26.402             | 5.8824            | $1.503 \times 10^{-3}$ | $3.7572 \times 10^{-2}$ | $2.452 \times 10^{-3}$ |
| Cysteine metabolism                           | 8          | 2    | 38.202             | 5.8824            | $1.611 \times 10^{-3}$ | $3.8652 \times 10^{-2}$ | $2.56 \times 10^{-3}$  |

Table S2. Cont.

| Metabolic Pathways                                                                                                                                                                                                      | Total Cmpd | Hits | Statistic $q$ | Expected $q$ | Raw $p$                 | Holm $p$ | FDR                     |
|-------------------------------------------------------------------------------------------------------------------------------------------------------------------------------------------------------------------------|------------|------|---------------|--------------|-------------------------|----------|-------------------------|
| Taurine and hypotaurine metabolism                                                                                                                                                                                      | 7          | 1    | 36.903        | 5.8824       | $7.496 \times 10^{-3}$  | 0.1724   | $1.1618 \times 10^{-2}$ |
| Galactose metabolism                                                                                                                                                                                                    | 25         | 4    | 20.806        | 5.8824       | $1.3267 \times 10^{-2}$ | 0.29187  | $2.0062 \times 10^{-2}$ |
| Pantothenate and CoA biosynthesis                                                                                                                                                                                       | 10         | 1    | 32.18         | 5.8824       | $1.408 \times 10^{-2}$  | 0.29567  | $2.0784 \times 10^{-2}$ |
| Beta-alanine metabolism                                                                                                                                                                                                 | 13         | 4    | 16.541        | 5.8824       | $3.4087 \times 10^{-2}$ | 0.68175  | $4.9149 \times 10^{-2}$ |
| Pentose phosphate pathway                                                                                                                                                                                               | 18         | 1    | 20.231        | 5.8824       | $6.1094 \times 10^{-2}$ | 1        | $8.6087 \times 10^{-2}$ |
| Intracellular signalling through adenosine receptor A2A and adenosine  intracellular signalling through adenosine receptor A2B and adenosine                                                                            | 7          | 2    | 13.071        | 5.8824       | $1.1236 \times 10^{-1}$ | 1        | $1.5481 \times 10^{-1}$ |
| Vitamin b6 metabolism                                                                                                                                                                                                   | 10         | 2    | 10.316        | 5.8824       | $1.7526 \times 10^{-1}$ | 1        | $2.3623 \times 10^{-1}$ |
| Excitatory neural signalling through through 5-hydroxytryptamine receptor (HTR) 4 and serotonin  excitatory neural signalling through 5-HTR 7 and serotonin  excitatory neural signalling through 5-HTR 6 and serotonin | 5          | 1    | 8.424         | 5.8824       | $2.4266 \times 10^{-1}$ | 1        | $2.8387 \times 10^{-1}$ |
| Corticotropin activation of cortisol production                                                                                                                                                                         | 5          | 1    | 8.424         | 5.8824       | $2.4266 \times 10^{-1}$ | 1        | $2.8387 \times 10^{-1}$ |
| Vasopressin regulation of water homeostasis                                                                                                                                                                             | 5          | 1    | 8.424         | 5.8824       | $2.4266 \times 10^{-1}$ | 1        | $2.8387 \times 10^{-1}$ |
| Intracellular signalling through FSH receptor and follicle stimulating hormone  intracellular signalling through LHCGR receptor and luteinizing hormone/ choriogonadotropin                                             | 4          | 1    | 8.424         | 5.8824       | $2.4266 \times 10^{-1}$ | 1        | $2.8387 \times 10^{-1}$ |
| Intracellular signalling through histamine H2 receptor and histamine                                                                                                                                                    | 5          | 1    | 8.424         | 5.8824       | $2.4266 \times 10^{-1}$ | 1        | $2.8387 \times 10^{-1}$ |
| Intracellular signalling through PGD2 receptor and prostaglandin D2                                                                                                                                                     | 5          | 1    | 8.424         | 5.8824       | $2.4266 \times 10^{-1}$ | 1        | $2.8387 \times 10^{-1}$ |
| Intracellular signalling through prostacyclin receptor and prostacyclin                                                                                                                                                 | 6          | 1    | 8.424         | 5.8824       | $2.4266 \times 10^{-1}$ | 1        | $2.8387 \times 10^{-1}$ |
| Folate and pterine biosynthesis                                                                                                                                                                                         | 17         | 2    | 8.0943        | 5.8824       | $2.6581 \times 10^{-1}$ | 1        | $3.0045 \times 10^{-1}$ |
| Fructose and mannose degradation                                                                                                                                                                                        | 18         | 1    | 7.6504        | 5.8824       | $2.6653 \times 10^{-1}$ | 1        | $3.0045 \times 10^{-1}$ |
| Butyrate metabolism                                                                                                                                                                                                     | 9          | 1    | 1.4981        | 5.8824       | $6.285 \times 10^{-1}$  | 1        | $6.8028 \times 10^{-1}$ |
| One carbon pool by folate                                                                                                                                                                                               | 8          | 1    | 1.4576        | 5.8824       | $6.3322 \times 10^{-1}$ | 1        | $6.8028 \times 10^{-1}$ |

Table S2. Cont.

| Metabolic Pathways           | Total Cmpd | Hits | Statistic <i>q</i> | Expected <i>q</i> | Raw <i>p</i>            | Holm <i>p</i> | FDR                     |
|------------------------------|------------|------|--------------------|-------------------|-------------------------|---------------|-------------------------|
| Inositol metabolism          | 19         | 2    | 2.6146             | 5.8824            | $6.5431 \times 10^{-1}$ | 1             | $6.8028 \times 10^{-1}$ |
| Insulin signalling           | 19         | 3    | 3.4459             | 5.8824            | $6.6305 \times 10^{-1}$ | 1             | $6.8028 \times 10^{-1}$ |
| RNA transcription            | 9          | 1    | 1.1743             | 5.8824            | $6.6864 \times 10^{-1}$ | 1             | $6.8028 \times 10^{-1}$ |
| Phospholipid biosynthesis    | 19         | 1    | 1.1693             | 5.8824            | $6.693 \times 10^{-1}$  | 1             | $6.8028 \times 10^{-1}$ |
| Nucleotide sugars metabolism | 9          | 1    | 0.73929            | 5.8824            | $7.3444 \times 10^{-1}$ | 1             | $7.3444 \times 10^{-1}$ |

Table S3. Result of quantitative enrichment analysis between homozygous mice on standard and high carbohydrate diet.

| Metabolic Pathways                                                                                                                                                                                             | Total Cmpd | Hits | Statistic <i>q</i> | Expected <i>q</i> | Raw <i>p</i> | Holm <i>p</i> | FDR     |
|----------------------------------------------------------------------------------------------------------------------------------------------------------------------------------------------------------------|------------|------|--------------------|-------------------|--------------|---------------|---------|
| Glycerolipid metabolism                                                                                                                                                                                        | 13         | 1    | 56.974             | 9.0909            | 0.004545     | 0.28179       | 0.17675 |
| Betaine metabolism                                                                                                                                                                                             | 10         | 5    | 27.483             | 9.0909            | 0.008893     | 0.54247       | 0.17675 |
| Tyrosine metabolism                                                                                                                                                                                            | 38         | 4    | 27.407             | 9.0909            | 0.009369     | 0.56214       | 0.17675 |
| Tryptophan metabolism                                                                                                                                                                                          | 34         | 5    | 24.445             | 9.0909            | 0.012649     | 0.74632       | 0.17675 |
| Pantothenate and coa biosynthesis                                                                                                                                                                              | 10         | 1    | 46.273             | 9.0909            | 0.01492      | 0.86537       | 0.17675 |
| Glycine, serine and threonine metabolism                                                                                                                                                                       | 26         | 9    | 23.588             | 9.0909            | 0.017105     | 0.97498       | 0.17675 |
| Methionine metabolism                                                                                                                                                                                          | 24         | 9    | 22.21              | 9.0909            | 0.020219     | 1             | 0.17908 |
| Phenylalanine and tyrosine metabolism                                                                                                                                                                          | 13         | 4    | 26.169             | 9.0909            | 0.024551     | 1             | 0.19027 |
| Purine metabolism                                                                                                                                                                                              | 45         | 12   | 19.265             | 9.0909            | 0.04478      | 1             | 0.26012 |
| Urea cycle                                                                                                                                                                                                     | 20         | 7    | 19.057             | 9.0909            | 0.048986     | 1             | 0.26012 |
| Catecholamine biosynthesis                                                                                                                                                                                     | 5          | 1    | 33.157             | 9.0909            | 0.050081     | 1             | 0.26012 |
| Bile acid biosynthesis                                                                                                                                                                                         | 49         | 7    | 20.48              | 9.0909            | 0.050346     | 1             | 0.26012 |
| Starch and sucrose metabolism                                                                                                                                                                                  | 14         | 3    | 20.349             | 9.0909            | 0.063278     | 1             | 0.26596 |
| Porphyrin metabolism                                                                                                                                                                                           | 22         | 1    | 29.309             | 9.0909            | 0.069088     | 1             | 0.26596 |
| Galactose metabolism                                                                                                                                                                                           | 25         | 4    | 19.865             | 9.0909            | 0.0857       | 1             | 0.26596 |
| Nicotinate and nicotinamide metabolism                                                                                                                                                                         | 13         | 3    | 18.557             | 9.0909            | 0.10065      | 1             | 0.26596 |
| Protein biosynthesis                                                                                                                                                                                           | 19         | 14   | 17.883             | 9.0909            | 0.10079      | 1             | 0.26596 |
| Excitatory neural signalling through 5- hydroxytryptamine receptor (HTR) 4 and serotonin excitatory neural signalling through 5-HTR 7 and serotonin excitatory neural signalling through 5-HTR 6 and serotonin | 5          | 1    | 24.36              | 9.0909            | 0.10295      | 1             | 0.26596 |
| Corticotropin activation of cortisol production                                                                                                                                                                | 5          | 1    | 24.36              | 9.0909            | 0.10295      | 1             | 0.26596 |
| Vasopressin regulation of water homeostasis                                                                                                                                                                    | 5          | 1    | 24.36              | 9.0909            | 0.10295      | 1             | 0.26596 |
| Intracellular signalling through FSH receptor and follicle stimulating hormone intracellular signalling through lhcg receptor and luteinizing hormone/ choriogonadotropin                                      | 4          | 1    | 24.36              | 9.0909            | 0.10295      | 1             | 0.26596 |
| Intracellular signalling through histamine H2 receptor and histamine                                                                                                                                           | 5          | 1    | 24.36              | 9.0909            | 0.10295      | 1             | 0.26596 |
| Intracellular signalling through PGD2 receptor and prostaglandin D2                                                                                                                                            | 5          | 1    | 24.36              | 9.0909            | 0.10295      | 1             | 0.26596 |
| Intracellular signalling through prostacyclin receptor and prostacyclin                                                                                                                                        | 6          | 1    | 24.36              | 9.0909            | 0.10295      | 1             | 0.26596 |

Table S3. Cont.

| Metabolic Pathways                                                                                                                            | Total Cmpd | Hits | Statistic <i>q</i> | Expected <i>q</i> | Raw <i>p</i> | Holm <i>p</i> | FDR     |
|-----------------------------------------------------------------------------------------------------------------------------------------------|------------|------|--------------------|-------------------|--------------|---------------|---------|
| Beta-alanine metabolism                                                                                                                       | 13         | 4    | 18.972             | 9.0909            | 0.10911      | 1             | 0.27059 |
| Arginine and proline metabolism                                                                                                               | 26         | 8    | 15.267             | 9.0909            | 0.11716      | 1             | 0.27939 |
| Ammonia recycling                                                                                                                             | 18         | 8    | 16.561             | 9.0909            | 0.13267      | 1             | 0.29522 |
| Glutathione metabolism                                                                                                                        | 10         | 4    | 16.468             | 9.0909            | 0.13694      | 1             | 0.29522 |
| Lysine degradation                                                                                                                            | 13         | 2    | 19.026             | 9.0909            | 0.13809      | 1             | 0.29522 |
| Intracellular signalling through adenosine receptor A2A and adenosine I intracellular signalling through adenosine receptor A2B and adenosine | 7          | 2    | 18.655             | 9.0909            | 0.14435      | 1             | 0.29832 |
| Valine, leucine and isoleucine degradation                                                                                                    | 36         | 3    | 15.254             | 9.0909            | 0.16817      | 1             | 0.33257 |
| Pyrimidine metabolism                                                                                                                         | 36         | 6    | 13.547             | 9.0909            | 0.17424      | 1             | 0.33257 |
| Cysteine metabolism                                                                                                                           | 8          | 2    | 16.869             | 9.0909            | 0.17701      | 1             | 0.33257 |
| Glutamate metabolism                                                                                                                          | 18         | 7    | 13.584             | 9.0909            | 0.18558      | 1             | 0.33432 |
| Histidine metabolism                                                                                                                          | 11         | 4    | 14.319             | 9.0909            | 0.19149      | 1             | 0.33432 |
| Insulin signalling                                                                                                                            | 19         | 3    | 14.45              | 9.0909            | 0.19412      | 1             | 0.33432 |
| Vitamin B6 metabolism                                                                                                                         | 10         | 2    | 14.872             | 9.0909            | 0.20242      | 1             | 0.33918 |
| Phospholipid biosynthesis                                                                                                                     | 19         | 1    | 14.933             | 9.0909            | 0.21467      | 1             | 0.35025 |
| Inositol metabolism                                                                                                                           | 19         | 2    | 13.088             | 9.0909            | 0.23776      | 1             | 0.37071 |
| Biotin metabolism                                                                                                                             | 4          | 1    | 13.545             | 9.0909            | 0.23917      | 1             | 0.37071 |
| RNA transcription                                                                                                                             | 9          | 1    | 12.541             | 9.0909            | 0.25873      | 1             | 0.39125 |
| Sphingolipid metabolism                                                                                                                       | 15         | 2    | 9.9573             | 9.0909            | 0.34635      | 1             | 0.50254 |
| Fructose and mannose degradation                                                                                                              | 18         | 1    | 8.8205             | 9.0909            | 0.34853      | 1             | 0.50254 |
| Alanine metabolism                                                                                                                            | 6          | 1    | 6.7891             | 9.0909            | 0.41339      | 1             | 0.5825  |
| Nucleotide sugars metabolism                                                                                                                  | 9          | 1    | 6.4467             | 9.0909            | 0.42585      | 1             | 0.5835  |
| Glycolysis                                                                                                                                    | 21         | 1    | 5.3214             | 9.0909            | 0.47071      | 1             | 0.5835  |
| Glycerol phosphate shuttle                                                                                                                    | 8          | 1    | 5.3214             | 9.0909            | 0.47071      | 1             | 0.5835  |
| Gluconeogenesis                                                                                                                               | 27         | 1    | 5.3214             | 9.0909            | 0.47071      | 1             | 0.5835  |
| Aspartate metabolism                                                                                                                          | 12         | 3    | 7.2703             | 9.0909            | 0.47252      | 1             | 0.5835  |
| Butyrate metabolism                                                                                                                           | 9          | 1    | 5.2206             | 9.0909            | 0.47506      | 1             | 0.5835  |
| Glucose-alanine cycle                                                                                                                         | 12         | 2    | 6.0553             | 9.0909            | 0.47998      | 1             | 0.5835  |
| Malate-aspartate shuttle                                                                                                                      | 8          | 3    | 5.1521             | 9.0909            | 0.54929      | 1             | 0.64473 |
| Ketone body metabolism                                                                                                                        | 10         | 2    | 5.271              | 9.0909            | 0.56027      | 1             | 0.64473 |
| One carbon pool by folate                                                                                                                     | 8          | 1    | 3.4804             | 9.0909            | 0.56154      | 1             | 0.64473 |
| Beta oxidation of very long chain fatty acids                                                                                                 | 14         | 1    | 3.0204             | 9.0909            | 0.58907      | 1             | 0.66404 |
| Citric acid cycle                                                                                                                             | 23         | 2    | 3.7354             | 9.0909            | 0.63647      | 1             | 0.6923  |
| Mitochondrial electron transport chain                                                                                                        | 15         | 2    | 3.7354             | 9.0909            | 0.63647      | 1             | 0.6923  |
| Folate and pterine biosynthesis                                                                                                               | 17         | 2    | 2.9161             | 9.0909            | 0.72298      | 1             | 0.77284 |
| Propanoate metabolism                                                                                                                         | 18         | 1    | 1.1408             | 9.0909            | 0.74111      | 1             | 0.77879 |
| Pentose phosphate pathway                                                                                                                     | 18         | 1    | 0.5445             | 9.0909            | 0.81972      | 1             | 0.84704 |
| Oxidation of branched chain fatty acids                                                                                                       | 14         | 2    | 1.5711             | 9.0909            | 0.84347      | 1             | 0.85729 |
| Taurine and hypotaurine metabolism                                                                                                            | 7          | 1    | 0.075561           | 9.0909            | 0.93242      | 1             | 0.93242 |

**Table S4.** Diet composition of Standard and High carbohydrate diet.

| <b>Standard Diet (SD)</b>                   |        |      | <b>High Carbohydrate Diet (HCD)</b>                   |        |          |
|---------------------------------------------|--------|------|-------------------------------------------------------|--------|----------|
| <b>(Teklad Global 18% Rodent Diet-2018)</b> |        |      | <b>(60% Dextrose Diet, Orange—TD.05256)</b>           |        |          |
| Crude Protein                               | %      | 18.6 | Casein                                                | g/kg   | 207      |
| Fat                                         | %      | 6.2  | Lard                                                  | g/kg   | 50       |
| Carbohydrate                                | %      | 44.2 | Dextrose, monohydrate                                 | g/kg   | 658      |
| Crude Fiber                                 | %      | 3.5  | Cellulose                                             | g/kg   | 21.81    |
| Neutral Detergent fiber                     | %      | 14.7 |                                                       |        |          |
| Ash                                         | %      | 5.3  |                                                       |        |          |
| Energy Density                              | kcal/g | 3.1  |                                                       |        |          |
| Calories from Protein                       | %      | 24   | Calories from Protein                                 | % kcal | 20.2     |
| Calories from Fat                           | %      | 18   | Calories from Fat                                     | % kcal | 12.9     |
| Calories carbohydrate                       | %      | 58   | Calories carbohydrate                                 | % kcal | 66.8     |
|                                             |        |      | Food color                                            | g/kg   | 0.15     |
| <b>Minerals</b>                             |        |      | <b>Mineral Mix, Rogers-Harper (170760)-50 g/kg</b>    |        |          |
| Calcium                                     | %      | 1    | Calcium Carbonate                                     | g/kg   | 292.955  |
| Phosphorus                                  | %      | 0.7  | Calcium Phosphate, dibasic, dihydrate                 | g/kg   | 4.3      |
| Non-Phytate Phosphorus                      | %      | 0.4  | Ammonium Paramolybdate, tetrahydrate                  | g/kg   | 0.025    |
| Sodium                                      | %      | 0.2  | Sodium Chloride                                       | g/kg   | 250.6    |
| Potassium                                   | %      | 0.6  | Potassium Phosphate, monobasic                        | g/kg   | 343.1    |
| Chloride                                    | %      | 0.4  | Zinc Chloride                                         | g/kg   | 0.2      |
| Magnesium                                   | %      | 0.2  | Magnesium Sulfate, heptahydrate                       | g/kg   | 99.8     |
| Zinc                                        | mg/kg  | 70   | Zinc Carbonate                                        | g/kg   | 0.04     |
| Manganese                                   | mg/kg  | 100  | Manganese Sulfate, monohydrate                        | g/kg   | 1.21     |
| Copper                                      | mg/kg  | 15   | Cupric Sulfate                                        | g/kg   | 1.56     |
| Iodine                                      | mg/kg  | 6    | Potassium Iodide                                      | g/kg   | 0.005    |
| Iron                                        | mg/kg  | 200  | Ferric Citrate                                        | g/kg   | 6.23     |
| Selenium                                    | mg/kg  | 0.23 | Sodium Selenite                                       | g/kg   | 0.015    |
| <b>Vitamins</b>                             |        |      | <b>Vitamin Mix, Teklad (40060)-10 g/kg</b>            |        |          |
| Vitamin A                                   | IU/g   | 15   | Vitamin A Palmitate (500,000 IU/g)                    | g/kg   | 3.9648   |
| Vitamin D3                                  | IU/g   | 1.5  | Vitamin D3, cholecalciferol (500,000 IU/g)            | g/kg   | 0.4405   |
| Vitamin E                                   | IU/kg  | 110  | Vitamin E, DL- $\alpha$ tocopheryl acetate (500 IU/g) | g/kg   | 24.2291  |
| Vitamin K3                                  | mg/kg  | 50   | Vitamin K3, menadione                                 | g/kg   | 4.9559   |
| Vitamin B1                                  | mg/kg  | 17   | Thiamin (81%)                                         | g/kg   | 2.2026   |
| Vitamin B2                                  | mg/kg  | 15   | Riboflavin                                            | g/kg   | 2.2026   |
| Niacin (Nicotinic acid)                     | mg/kg  | 70   | Niacin                                                | g/kg   | 9.9119   |
| Vitamin B6                                  | mg/kg  | 18   | Pyridoxine HCl                                        | g/kg   | 2.2026   |
| Pantothenic Acid                            | mg/kg  | 33   | Calcium Pantothenate                                  | g/kg   | 6.6079   |
| Vitamin B12                                 | mg/kg  | 0.08 | Vitamin B12 (0.1% in mannitol)                        | g/kg   | 2.9736   |
| Biotin                                      | mg/kg  | 0.4  | Biotin                                                | g/kg   | 0.0441   |
| Folate                                      | mg/kg  | 4    | Folic Acid                                            | g/kg   | 0.1982   |
| Choline                                     | mg/kg  | 1200 | Choline Dihydrogen Citrate                            | g/kg   | 349.6916 |
|                                             |        |      | Vitamin C, (~97.5%)                                   | g/kg   | 101.6604 |
|                                             |        |      | Inositol                                              | g/kg   | 11.0132  |
|                                             |        |      | p-Aminobenzoic Acid                                   | g/kg   | 11.0132  |
|                                             |        |      | Corn Starch                                           | g/kg   | 466.687  |



Table S4. Cont.

| Standard Diet (SD)    |   |     | High Carbohydrate Diet (HCD) |      |   |
|-----------------------|---|-----|------------------------------|------|---|
| <b>Amino Acids</b>    |   |     |                              |      |   |
| Aspartic Acid         | % | 1.4 |                              |      |   |
| Glutamic Acid         | % | 3.4 |                              |      |   |
| Alanine               | % | 1.1 |                              |      |   |
| Glycine               | % | 0.8 |                              |      |   |
| Threonine             | % | 0.7 |                              |      |   |
| Proline               | % | 1.6 |                              |      |   |
| Serine                | % | 1.1 |                              |      |   |
| Leucine               | % | 1.8 |                              |      |   |
| Isoleucine            | % | 0.8 |                              |      |   |
| Valine                | % | 90% |                              |      |   |
| Phenylalanine         | % | 1   |                              |      |   |
| Tyrosine              | % | 0.6 |                              |      |   |
| Methionine            | % | 0.4 | DL-Methionine                | g/kg | 3 |
| Cystine               | % | 0.3 |                              |      |   |
| Lysine                | % | 0.9 |                              |      |   |
| Histidine             | % | 0.4 |                              |      |   |
| Arginine              | % | 1   |                              |      |   |
| Tryptophan            | % | 0.2 |                              |      |   |
| <b>Fatty Acids</b>    |   |     |                              |      |   |
| Palmitic              | % | 0.7 |                              |      |   |
| Stearic               | % | 0.2 |                              |      |   |
| Oleic                 | % | 1.2 |                              |      |   |
| Linoleic              | % | 3.1 |                              |      |   |
| Linolenic             | % | 0.3 |                              |      |   |
| Total Saturated       | % | 0.9 |                              |      |   |
| Total Monounsaturated | % | 1.3 |                              |      |   |
| Total Polyunsaturated | % | 3.4 |                              |      |   |
